# Supplementary material for: Efficacy and Cost-Effectiveness of Phenotyping for Rice Resistance and Tolerance to Planthoppers
Source: MDPI journal article supplement (doi:10.3390/insects12100847), 2021-09-22
Supplement: s1 [file s1]

## Supplementary information

# **Efficacy and cost-effectiveness of phenotyping for rice resistance and tolerance to planthoppers**

**Finbarr G. Horgan <sup>1,2,\*</sup>, Enrique A. Mundaca <sup>2</sup>, Reyeul Quintana <sup>3</sup>, Alberto I. Naredo <sup>3</sup>, Maria Liberty P. Almazan <sup>3</sup> and Carmencita C. Bernal <sup>3</sup>**

- <sup>1.</sup> EcoLaVerna Integral Restoration Ecology, Bridestown, Kildinan, Co. Cork, Ireland
  - <sup>2.</sup> Universidad Católica del Maule, Facultad de Ciencias Agrarias y Forestales, Escuela de Agronomía, Casilla 7-D, Curicó, Chile
  - <sup>3.</sup> International Rice Research Institute, DAPO Box 7777, Metro Manila, Philippines \*
- Correspondence: [f.horgan@ecolaverna.org](mailto:f.horgan@ecolaverna.org)

**Table S1:** Results from the SSST<sub>7.8n</sub> test with 16 rice lines. The SSST<sub>7.8n</sub> is a bulk test that is rapidly evaluated using damage ratings.

| Rice Line            | Plant weight (mg)(control) <sup>2</sup> | Plant weight (mg)(infested) <sup>2</sup> | Average plant weight Loss (proportion) <sup>1,2</sup> | Plant death (proportion) <sup>2</sup> | Damage rating <sup>2,3</sup>    |
|----------------------|-----------------------------------------|------------------------------------------|-------------------------------------------------------|---------------------------------------|---------------------------------|
| Rathu Heenati        | 3.41±0.76 <sup>ab</sup>                 | 2.48±0.92                                | <b>0.32±0.16</b> <sup>a</sup>                         | 0.25±0.09 <sup>ab</sup>               | <b>3.33±0.33</b> <sup>a</sup>   |
| IR62                 | 2.82±0.46 <sup>ab</sup>                 | 2.14±0.71                                | <b>0.32±0.19</b> <sup>ab</sup>                        | 0.28±0.13 <sup>a</sup>                | <b>4.00±0.45</b> <sup>ab</sup>  |
| PTB33                | 4.33±1.08 <sup>ab</sup>                 | 3.13±1.13                                | <b>0.35±0.16</b> <sup>abc</sup>                       | 0.22±0.16 <sup>ab</sup>               | <b>4.00±1.00</b> <sup>abc</sup> |
| IR65482-4            | 3.25±0.53 <sup>ab</sup>                 | 1.41±0.44                                | 0.56±0.09 <sup>abcd</sup>                             | 0.28±0.12 <sup>ab</sup>               | <b>4.67±0.61</b> <sup>abc</sup> |
| Triveni              | 2.92±0.45 <sup>ab</sup>                 | 0.75±0.22                                | 0.71±0.08 <sup>abcde</sup>                            | 0.61±0.13 <sup>abc</sup>              | <b>5.67±0.42</b> <sup>abc</sup> |
| IR46                 | 2.81±0.51 <sup>ab</sup>                 | 0.47±0.12                                | 0.81±0.04 <sup>bcde</sup>                             | 0.70±0.11 <sup>bcd</sup>              | <b>6.67±0.80</b> <sup>bcd</sup> |
| Mudgo                | 5.89±1.17 <sup>b</sup>                  | 1.33±0.43                                | 0.79±0.04 <sup>bcde</sup>                             | 0.60±0.14 <sup>abcd</sup>             | <b>6.67±0.95</b> <sup>cde</sup> |
| IR65482-7            | 2.81±0.68 <sup>ab</sup>                 | 0.46±0.07                                | 0.80±0.03 <sup>bcde</sup>                             | 0.68±0.11 <sup>bcd</sup>              | <b>7.00±0.52</b> <sup>cde</sup> |
| IR40                 | 1.68±0.28 <sup>a</sup>                  | 0.31±0.06                                | 0.78±0.04 <sup>bcde</sup>                             | 0.77±0.07 <sup>cde</sup>              | 8.00±0.45 <sup>def</sup>        |
| Utri Rajapan         | 3.18±0.51 <sup>ab</sup>                 | 0.67±0.15                                | 0.78±0.02 <sup>abcde</sup>                            | 0.83±0.07 <sup>cde</sup>              | 8.00±0.45 <sup>def</sup>        |
| TKM6                 | 2.83±0.71 <sup>ab</sup>                 | 0.39±0.10                                | 0.83±0.04 <sup>cde</sup>                              | 0.68±0.15 <sup>cde</sup>              | 8.33±0.42 <sup>def</sup>        |
| ASD7                 | 5.12±0.91 <sup>ab</sup>                 | 0.97±0.24                                | 0.81±0.02 <sup>cde</sup>                              | 0.94±0.04 <sup>cde</sup>              | 8.67±0.33 <sup>ef</sup>         |
| Asominori            | 2.07±0.32 <sup>a</sup>                  | 0.30±0.06                                | 0.83±0.03 <sup>de</sup>                               | 0.97±0.02 <sup>de</sup>               | 9.00±0.00 <sup>f</sup>          |
| IR22                 | 3.03±0.73 <sup>ab</sup>                 | 0.38±0.08                                | 0.83±0.04 <sup>e</sup>                                | 0.97±0.02 <sup>cde</sup>              | 9.00±0.00 <sup>f</sup>          |
| T65                  | 1.94±0.31 <sup>a</sup>                  | 0.19±0.01                                | 0.87±0.03 <sup>e</sup>                                | 1.00±0.00 <sup>e</sup>                | 9.00±0.00 <sup>f</sup>          |
| TN1                  | 3.32±0.94 <sup>ab</sup>                 | 0.38±0.07                                | 0.85±0.02 <sup>e</sup>                                | 1.00±0.00 <sup>e</sup>                | 9.00±0.00 <sup>f</sup>          |
| F-value <sup>4</sup> | 2.477***                                |                                          | 5.854***                                              | 12.813***                             | 19.106***                       |

1: Average plant weight loss is calculated as (weight of control plants – weight of infested plants)//weight of control plants  
2: Numbers are means ± SEM; lowercase letters indicate homogenous groups based on Tukey tests (P > 0.05); results indicated in bold font are significantly less affected by planthoppers than the susceptible check TN1 based on Duncan’s many-to-one tests (P > 0.05)  
3: Damage ratings are based on the standard evaluations systems (SES) for bulk tests as outlined in Table 1  
4: DF = 15,80; \*\*\* = P ≤ 0.005 (N = 6)

**Table S2:** Results from nymph Survival<sub>7.8n</sub> test with 16 varieties. The Survival<sub>7.8n</sub> test is a performance test that corresponds to the SSST7.8n in terms of plant age and insect densities

| Rice line                | Plant weight<br>(control)(g) <sup>2</sup> | Plant weight<br>(control)(g) <sup>2</sup> | Plant weight<br>loss<br>(proportion) <sup>1,2</sup> | Damage<br>rating <sup>2,3</sup> | Survival<br>(proportion) <sup>2</sup> | Development (proportion) <sup>2</sup> |                        |                        |           | Female<br>(proportion) <sup>2</sup> | Pooled weight of<br>planthoppers (mg)<br><sup>2,3</sup> |
|--------------------------|-------------------------------------------|-------------------------------------------|-----------------------------------------------------|---------------------------------|---------------------------------------|---------------------------------------|------------------------|------------------------|-----------|-------------------------------------|---------------------------------------------------------|
|                          |                                           |                                           |                                                     |                                 |                                       | 3 <sup>rd</sup> instar                | 4 <sup>th</sup> instar | 5 <sup>th</sup> instar | Adult     |                                     |                                                         |
| Rathu Heenati            | 0.11±0.02                                 | 0.10±0.04                                 | <b>0.09±0.24</b> <sup>a</sup>                       | <b>3.00±1.26</b> <sup>ab</sup>  | 0.71±0.11 <sup>abc</sup>              | 0.19±0.16                             | 0.10±0.05              | 0.10±0.07              | 0.67±0.16 | 0.42±0.14                           | 1.86±0.66                                               |
| IR62                     | 0.09±0.01                                 | 0.06±0.01                                 | <b>0.38±0.11</b> <sup>a</sup>                       | <b>3.17±0.91</b> <sup>ab</sup>  | 0.46±0.18 <sup>abc</sup>              | 0.00±0.00                             | 0.08±0.05              | 0.25±0.25              | 0.68±0.24 | 0.45±0.23                           | 2.78±1.08                                               |
| PTB33                    | 0.13±0.03                                 | 0.05±0.01                                 | <b>0.51±0.08</b> <sup>a</sup>                       | <b>3.00±0.00</b> <sup>ab</sup>  | 0.69±0.10 <sup>c</sup>                | 0.11±0.08                             | 0.11±0.08              | 0.00±0.00              | 0.88±0.06 | 0.41±0.06                           | 2.97±1.22                                               |
| IR65482-4                | 0.09±0.02                                 | 0.07±0.00                                 | <b>-0.35±0.66</b> <sup>a</sup>                      | <b>2.00±0.45</b> <sup>a</sup>   | 0.69±0.12 <sup>abc</sup>              | 0.02±0.02                             | 0.08±0.05              | 0.00±0.00              | 0.90±0.08 | 0.47±0.14                           | 2.62±0.90                                               |
| Triveni                  | 0.10±0.02                                 | 0.02±0.00                                 | 0.67±0.11 <sup>ab</sup>                             | <b>4.33±0.42</b> <sup>abc</sup> | 0.88±0.08 <sup>c</sup>                | 0.00±0.00                             | 0.00±0.00              | 0.03±0.03              | 0.97±0.03 | 0.49±0.08                           | 3.31±0.96                                               |
| IR46                     | 0.12±0.02                                 | 0.00±0.00                                 | 0.91±0.02 <sup>b</sup>                              | 8.00±0.68 <sup>cd</sup>         | 0.46±0.11 <sup>abc</sup>              | 0.13±0.13                             | 0.00±0.00              | 0.05±0.05              | 0.90±0.07 | 0.51±0.08                           | 2.53±1.27                                               |
| Mudgo                    | 0.14±0.03                                 | 0.02±0.00                                 | 0.81±0.05 <sup>ab</sup>                             | 6.00±1.00 <sup>bcd</sup>        | 0.69±0.12 <sup>bc</sup>               | 0.06±0.06                             | 0.00±0.00              | 0.00±0.00              | 0.93±0.07 | 0.44±0.07                           | 2.94±1.41                                               |
| IR65482-7                | 0.11±0.01                                 | 0.01±0.00                                 | 0.80±0.04 <sup>ab</sup>                             | <b>4.33±0.99</b> <sup>abc</sup> | 0.52±0.11 <sup>abc</sup>              | 0.00±0.00                             | 0.00±0.00              | 0.17±0.17              | 0.83±0.17 | 0.53±0.06                           | 3.34±1.17                                               |
| IR40                     | 0.09±0.01                                 | 0.01±0.00                                 | 0.88±0.03 <sup>ab</sup>                             | 8.00±1.00 <sup>cd</sup>         | 0.27±0.09 <sup>abc</sup>              | 0.00±0.00                             | 0.00±0.00              | 0.00±0.00              | 1.00±0.00 | 0.37±0.14                           | 2.33±1.00                                               |
| Utri Rajapan             | 0.12±0.03                                 | 0.01±0.00                                 | 0.84±0.04 <sup>ab</sup>                             | 7.67±0.67 <sup>cd</sup>         | 0.63±0.14 <sup>abc</sup>              | 0.08±0.08                             | 0.00±0.00              | 0.00±0.00              | 0.92±0.08 | 0.73±0.10                           | 2.21±0.86                                               |
| TKM6                     | 0.10±0.01                                 | 0.01±0.00                                 | 0.87±0.04 <sup>ab</sup>                             | 7.67±0.84 <sup>cd</sup>         | 0.27±0.11 <sup>abc</sup>              | 0.00±0.00                             | 0.25±0.25              | 0.00±0.00              | 0.75±0.25 | 0.30±0.07                           | 1.85±0.88                                               |
| ASD7                     | 0.13±0.03                                 | 0.02±0.00                                 | 0.87±0.05 <sup>ab</sup>                             | 7.33±0.80 <sup>cd</sup>         | 0.75±0.09 <sup>bc</sup>               | 0.00±0.00                             | 0.00±0.00              | 0.00±0.00              | 1.00±0.00 | 0.43±0.05                           | 2.84±1.13                                               |
| Asominori                | 0.07±0.02                                 | 0.01±0.00                                 | 0.87±0.06 <sup>ab</sup>                             | 7.33±1.09 <sup>cd</sup>         | 0.33±0.11 <sup>abc</sup>              | 0.00±0.00                             | 0.25±0.17              | 0.00±0.00              | 0.75±0.17 | 0.44±0.14                           | 1.53±1.08                                               |
| IR22                     | 0.09±0.01                                 | 0.01±0.00                                 | 0.87±0.07 <sup>ab</sup>                             | 8.67±0.33 <sup>d</sup>          | 0.15±0.06 <sup>ab</sup>               | 0.00±0.00                             | 0.00±0.00              | 0.25±0.25              | 0.75±0.25 | 0.72±0.15                           | 0.73±0.75                                               |
| T65                      | 0.07±0.01                                 | 0.01±0.00                                 | 0.87±0.08 <sup>ab</sup>                             | 8.67±0.33 <sup>a</sup>          | 0.02±0.02 <sup>a</sup>                | 1.00±0.00                             | 0.00±0.00              | 0.00±0.00              | 0.00±0.00 | na                                  | 0.14±0.00                                               |
| TN1                      | 0.09±0.02                                 | 0.01±0.00                                 | 0.87±0.09 <sup>ab</sup>                             | 7.67±0.67 <sup>cd</sup>         | 0.25±0.14 <sup>abc</sup>              | 0.00±0.00                             | 0.00±0.00              | 0.33±0.33              | 0.83±0.17 | 0.75±0.13                           | 2.46±1.13                                               |
| F-line <sup>4</sup>      | 1.273ns                                   |                                           | 1.756*                                              | 8.802***                        | 4.502***                              |                                       |                        |                        | 1.099ns   | 1.604ns                             | 1.548ns                                                 |
| F-covariate <sup>4</sup> |                                           |                                           | 10.447***                                           |                                 | 3.894*                                |                                       |                        |                        |           |                                     |                                                         |

1: Plant weight loss is calculated as (weight of control plants – weight of infested plants)/weight of control plants  
2: Numbers are means ± SEM; lowercase letters indicate homogenous groups based on Tukey tests (P > 0.05); results indicated in bold font are significantly less affected by planthoppers than the susceptible check TN1 based on Duncan’s many-to-one tests (P > 0.05)  
3: Damage ratings are based on the standard evaluations system (SES) for individual plants as outlined in Table 1  
4: DF = 15,80 or 15,79 where the covariate plant weight had a significant effect; \*\*\* = P ≤ 0.005, \* = P ≤ 0.05, ns = P ≥ 0.05 (N = 6)

**Table S3:** Results from MSST<sub>7.2n</sub> with 16 rice lines. The MSST<sub>7.2n</sub> is a bulk test that is rapidly evaluated using damage ratings.

| Rice line            | Plant weight (mg)(control) <sup>2</sup> | Plant weight (mg)(infested) <sup>2</sup> | Average plant weight loss (proportion) <sup>1,2</sup> | Plant death (proportion) <sup>2</sup> | Damage rating <sup>2,3</sup>   |
|----------------------|-----------------------------------------|------------------------------------------|-------------------------------------------------------|---------------------------------------|--------------------------------|
| Rathu Heenati        | 10.75±2.24 <sup>abc</sup>               | 14.36±1.66                               | <b>-0.41±0.13</b> <sup>ab</sup>                       | <b>0.00±0.00</b> <sup>a</sup>         | <b>3.00±0.00</b> <sup>a</sup>  |
| IR62                 | 7.45±1.28 <sup>ab</sup>                 | 12.24±2.79                               | <b>-0.69±0.23</b> <sup>a</sup>                        | <b>0.01±0.03</b> <sup>a</sup>         | <b>2.67±0.33</b> <sup>a</sup>  |
| PTB33                | 12.72±2.22 <sup>abc</sup>               | 16.00±2.65                               | <b>-0.27±0.13</b> <sup>a</sup>                        | <b>0.00±0.00</b> <sup>a</sup>         | <b>3.00±0.00</b> <sup>a</sup>  |
| IR65482-4-136-2-2    | 8.94±1.22 <sup>abc</sup>                | 8.49±1.55                                | 0.08±0.08 <sup>abc</sup>                              | 0.11±0.10 <sup>a</sup>                | <b>4.33±0.67</b> <sup>ab</sup> |
| Triveni              | 8.28±1.84 <sup>ab</sup>                 | 7.12±2.62                                | 0.19±0.10 <sup>abcd</sup>                             | 0.46±0.18 <sup>ab</sup>               | 6.00±1.13 <sup>bc</sup>        |
| IR46                 | 8.26±1.36 <sup>ab</sup>                 | 3.53±0.68                                | 0.55±0.08 <sup>cdef</sup>                             | 0.72±0.14 <sup>bc</sup>               | 8.00±0.68 <sup>cd</sup>        |
| Mudgo                | 20.32±2.18 <sup>c</sup>                 | 13.27±2.61                               | 0.34±0.08 <sup>abcde</sup>                            | 0.51±0.10 <sup>ab</sup>               | 6.33±0.67 <sup>bc</sup>        |
| IR65482-7-216-1-2-B  | 8.32±1.95 <sup>ab</sup>                 | 4.33±0.74                                | 0.43±0.08 <sup>bcdef</sup>                            | 0.80±0.08 <sup>bc</sup>               | 7.67±0.67 <sup>cd</sup>        |
| IR40                 | 6.01±1.78 <sup>a</sup>                  | 2.37±0.51                                | 0.51±0.09 <sup>cdef</sup>                             | 1.00±0.00 <sup>d</sup>                | 9.00±0.00 <sup>d</sup>         |
| Utri Rajapan         | 12.16±2.23 <sup>abc</sup>               | 6.16±1.29                                | 0.48±0.05 <sup>cdef</sup>                             | 0.85±0.08 <sup>bcd</sup>              | 8.33±0.42 <sup>cd</sup>        |
| TKM6                 | 8.79±2.15 <sup>ab</sup>                 | 3.33±0.74                                | 0.51±0.11 <sup>def</sup>                              | 0.92±0.05 <sup>cd</sup>               | 8.67±0.33 <sup>d</sup>         |
| ASD7                 | 17.76±1.92 <sup>bc</sup>                | 7.24±1.50                                | 0.59±0.05 <sup>ef</sup>                               | 0.92±0.07 <sup>cd</sup>               | 8.33±0.42 <sup>cd</sup>        |
| Asominori            | 6.66±1.50 <sup>a</sup>                  | 2.17±0.26                                | 0.57±0.09 <sup>ef</sup>                               | 0.96±0.03 <sup>cd</sup>               | 9.00±0.00 <sup>d</sup>         |
| IR22                 | 8.32±1.67 <sup>ab</sup>                 | 2.23±0.28                                | 0.67±0.07 <sup>f</sup>                                | 0.99±0.01 <sup>d</sup>                | 9.00±0.00 <sup>d</sup>         |
| Taichung 65          | 5.93±1.42 <sup>a</sup>                  | 2.82±1.52                                | 0.52±0.12 <sup>ef</sup>                               | 0.87±0.10 <sup>cd</sup>               | 8.00±0.68 <sup>cd</sup>        |
| Taichung Native 1    | 11.99±1.74 <sup>abc</sup>               | 3.45±0.40                                | 0.71±0.05 <sup>f</sup>                                | 0.84±0.16 <sup>cd</sup>               | 9.00±0.00 <sup>d</sup>         |
| F-value <sup>4</sup> | 4.357***                                |                                          | 11.738***                                             | 20.675***                             | 20.199***                      |

1: Average plant weight loss is calculated as (weight of control plants– weight of infested plants)/weight of control plants; a negative value indicates a gain in weight after exposure to insects

2: Numbers are means ± SEM; lowercase letters indicate homogenous groups based on Tukey tests (P > 0.05), results indicated in bold font are significantly less affected by planthoppers than the susceptible check TN1 based on Duncan’s many-to-one tests (P > 0.05)

3: Damage ratings are based on the standard evaluations system (SES) for bulk tests as outlined in Table 1

4: DF = 15,80; \*\*\* = P ≤ 0.005 (N = 6)

**Table S4:** Results from Build-up<sub>7.2f</sub> test. The Build-up<sub>7.2f</sub> test is a performance test that corresponds to the MSST<sub>7.2n</sub> bulk tests because the bulk test was designed to permit nymphs to develop to the adult stage.

| Rice line                | Plant weight<br>(g)(control) <sup>2</sup> | Plant weight<br>(g)(infested) <sup>2</sup> | Weight loss<br>(proportion) <sup>1,2</sup> | Development (proportion at each instar) <sup>2</sup> |                        |                        |                        | Number of<br>planthoppers <sup>2</sup> | Weight of<br>planthoppers <sup>2</sup> (mg) |
|--------------------------|-------------------------------------------|--------------------------------------------|--------------------------------------------|------------------------------------------------------|------------------------|------------------------|------------------------|----------------------------------------|---------------------------------------------|
|                          |                                           |                                            |                                            | 1 <sup>st</sup> instar                               | 2 <sup>nd</sup> instar | 3 <sup>rd</sup> instar | 4 <sup>th</sup> instar |                                        |                                             |
| Rathu Heenati            | 0.29±0.04                                 | 0.25±0.29                                  | <b>0.02±0.23</b> <sup>a</sup>              | <b>0.67±0.12</b> <sup>b</sup>                        | 0.22±0.06              | 0.12±0.07              | 0.00±0.00              | 186.83±73.21                           | 2.66±0.99                                   |
| IR62                     | 0.28±0.03                                 | 0.22±0.28                                  | 0.17±0.07 <sup>ab</sup>                    | 0.49±0.09 <sup>ab</sup>                              | 0.28±0.03              | 0.18±0.08              | 0.05±0.04              | 225.67±58.42                           | 4.35±0.97                                   |
| PTB33                    | 0.32±0.05                                 | 0.28±0.32                                  | <b>0.07±0.11</b> <sup>ab</sup>             | 0.34±0.04 <sup>ab</sup>                              | 0.50±0.08              | 0.13±0.04              | 0.02±0.01              | 219.83±53.95                           | 4.76±0.96                                   |
| IR65482-4                | 0.32±0.03                                 | 0.24±0.31                                  | 0.20±0.08 <sup>ab</sup>                    | 0.41±0.08 <sup>ab</sup>                              | 0.32±0.05              | 0.25±0.11              | 0.01±0.01              | 205.00±42.70                           | 4.65±1.18                                   |
| Triveni                  | 0.28±0.04                                 | 0.17±0.28                                  | 0.32±0.15 <sup>ab</sup>                    | 0.40±0.07 <sup>ab</sup>                              | 0.32±0.02              | 0.24±0.07              | 0.04±0.01              | 363.61±43.27                           | 6.04±0.91                                   |
| IR46                     | 0.58±0.33                                 | 0.15±0.57                                  | 0.48±0.10 <sup>ab</sup>                    | 0.36±0.03 <sup>ab</sup>                              | 0.34±0.05              | 0.26±0.06              | 0.04±0.02              | 312.50±49.12                           | 6.83±0.98                                   |
| Mudgo                    | 0.40±0.04                                 | 0.30±0.39                                  | 0.23±0.11 <sup>ab</sup>                    | 0.38±0.07 <sup>ab</sup>                              | 0.34±0.05              | 0.28±0.08              | 0.01±0.00              | 225.17±72.40                           | 4.79±1.32                                   |
| IR65482-7                | 0.28±0.03                                 | 0.15±0.27                                  | 0.41±0.11 <sup>ab</sup>                    | 0.39±0.07 <sup>ab</sup>                              | 0.34±0.06              | 0.24±0.03              | 0.03±0.01              | 308.00±52.65                           | 6.90±0.79                                   |
| IR40                     | 0.25±0.03                                 | 0.12±0.24                                  | 0.45±0.07 <sup>ab</sup>                    | 0.29±0.06 <sup>a</sup>                               | 0.34±0.03              | 0.32±0.04              | 0.05±0.02              | 211.67±58.24                           | 5.10±1.15                                   |
| Utri Rajapan             | 0.29±0.02                                 | 0.20±0.28                                  | 0.28±0.13 <sup>ab</sup>                    | 0.28±0.04 <sup>a</sup>                               | 0.41±0.09              | 0.28±0.05              | 0.03±0.01              | 332.00±66.22                           | 6.68±1.08                                   |
| TKM6                     | 0.33±0.02                                 | 0.15±0.32                                  | 0.52±0.05 <sup>ab</sup>                    | 0.36±0.05 <sup>ab</sup>                              | 0.36±0.06              | 0.24±0.03              | 0.05±0.01              | 202.33±41.58                           | 4.37±0.81                                   |
| ASD7                     | 0.37±0.03                                 | 0.22±0.36                                  | 0.41±0.05 <sup>ab</sup>                    | 0.31±0.02 <sup>a</sup>                               | 0.35±0.02              | 0.32±0.03              | 0.03±0.01              | 297.33±26.03                           | 6.43±1.50                                   |
| Asominori                | 0.28±0.03                                 | 0.17±0.28                                  | 0.35±0.07 <sup>ab</sup>                    | 0.37±0.08 <sup>ab</sup>                              | 0.35±0.05              | 0.26±0.05              | 0.02±0.01              | 108.83±30.60                           | 3.26±0.62                                   |
| IR22                     | 0.27±0.03                                 | 0.14±0.26                                  | 0.46±0.10 <sup>ab</sup>                    | 0.37±0.04 <sup>ab</sup>                              | 0.28±0.05              | 0.31±0.04              | 0.04±0.02              | 262.33±62.40                           | 5.27±0.64                                   |
| T65                      | 0.26±0.03                                 | 0.09±0.25                                  | 0.58±0.06 <sup>b</sup>                     | 0.53±0.07 <sup>ab</sup>                              | 0.28±0.03              | 0.18±0.04              | 0.02±0.01              | 202.00±34.81                           | 3.32±0.49                                   |
| TN1                      | 0.24±0.03                                 | 0.13±0.23                                  | 0.41±0.13 <sup>ab</sup>                    | 0.40±0.05 <sup>ab</sup>                              | 0.37±0.02              | 0.22±0.05              | 0.01±0.01              | 265.50±57.71                           | 5.24±1.09                                   |
| F-line <sup>3</sup>      | 0.884ns                                   |                                            | 2.489***                                   | 1.902*                                               | 1.492ns                | 0.891ns                | 1.057ns                | 1.154ns                                | 1.691ns                                     |
| F-covariate <sup>3</sup> |                                           |                                            | 11.022***                                  |                                                      |                        |                        |                        |                                        |                                             |

1: Average plant weight loss is calculated as (weight of control plants – weight of infested plants)/weight of control plants; a negative value indicates a gain in weight after exposure to insects

2: Numbers are means ± SEM; lowercase letters indicate homogenous groups based on Tukey tests (P > 0.05); results indicated in bold font are significantly less affected by planthoppers than the susceptible check TN1 based on Duncan’s many-to-one tests (P > 0.05)

3: DF = 15,80; \*\*\* = P ≤ 0.005; \* = P ≤ 0.05; ns = P > 0.05 (N = 6)

**Table S5:** Results from MSST<sub>20.4n</sub> with 16 rice lines. The MSST<sub>20.4n</sub> is a bulk test that is rapidly evaluated using damage ratings.

| Rice line                | Plant weight (mg)(control) <sup>2</sup> | Plant weight (mg)(infested) <sup>2</sup> | Average plant weight loss (proportion) <sup>1,2</sup> | Plant death (proportion) <sup>2</sup> | Damage rating <sup>2,3</sup> |
|--------------------------|-----------------------------------------|------------------------------------------|-------------------------------------------------------|---------------------------------------|------------------------------|
| Rathu Heenati            | 13.42±1.29 cdef                         | 14.38±2.61                               | <b>-0.08±0.15</b> ab                                  | 0.02±0.02 ab                          | <b>3.00±0.00</b> a           |
| IR62                     | 11.69±0.66 bcde                         | 11.35±0.79                               | 0.03±0.09 ab                                          | 0.00±0.00 a                           | <b>3.00±0.00</b> a           |
| PTB33                    | 18.54±3.16 efg                          | 20.49±2.40                               | <b>-0.20±0.17</b> a                                   | 0.18±0.16 ab                          | <b>3.00±0.00</b> a           |
| IR65482-4                | 14.38±0.99 def                          | 11.39±0.98                               | 0.20±0.07 abc                                         | 0.03±0.02 ab                          | <b>3.33±0.33</b> ab          |
| Triveni                  | 13.85±1.01 cdef                         | 9.46±0.86                                | 0.28±0.13 abc                                         | 0.09±0.07 ab                          | <b>4.67±0.33</b> bc          |
| IR46                     | 12.30±1.24 bcde                         | 9.59±1.00                                | 0.15±0.14 abc                                         | 0.09±0.05 ab                          | <b>4.67±0.33</b> bc          |
| Mudgo                    | 29.33±4.22 g                            | 16.04±1.50                               | 0.41±0.09 bc                                          | 0.31±0.06 abcd                        | <b>5.00±0.00</b> c           |
| IR65482-7                | 11.41±1.16 bcde                         | 8.18±1.17                                | 0.24±0.14 abc                                         | 0.32±0.14 ab                          | <b>5.00±0.52</b> c           |
| IR40                     | 7.44±0.33 abc                           | 4.21±0.53                                | 0.41±0.09 bc                                          | 0.91±0.06 e                           | 8.00±0.45 de                 |
| Utri Rajapan             | 14.63±1.66 def                          | 12.86±1.32                               | 0.04±0.14 ab                                          | 0.12±0.07 ab                          | <b>4.67±0.33</b> bc          |
| TKM6                     | 10.58±0.57 abcde                        | 6.84±0.88                                | 0.35±0.10 abc                                         | 0.30±0.14 abcd                        | <b>6.33±0.67</b> cd          |
| ASD7                     | 22.65±1.90 fg                           | 12.28±1.61                               | 0.47±0.05 bc                                          | 0.28±0.12 abc                         | <b>6.33±0.67</b> cd          |
| Asominori                | 6.84±0.33 ab                            | 4.20±0.68                                | 0.39±0.11 abc                                         | 0.81±0.08 cde                         | <b>7.33±0.61</b> de          |
| IR22                     | 11.34±0.49 bcde                         | 5.51±0.44                                | 0.49±0.04 bc                                          | 0.93±0.04 e                           | 8.33±0.42 e                  |
| T65                      | 5.79±0.77 a                             | 2.29±0.35                                | 0.57±0.04 c                                           | 0.85±0.14 e                           | 9.00±0.00 e                  |
| TN1                      | 10.09±2.92 abcd                         | 6.43±1.79                                | 0.34±0.05 abc                                         | 0.87±0.13 de                          | 9.00±0.00 e                  |
| F-rice line <sup>4</sup> | 11.438***                               |                                          | 5.286***                                              | 13.715***                             | 40.446***                    |
| F-covariate <sup>4</sup> |                                         |                                          | 5.551*                                                |                                       |                              |

1: Average plant weight loss is calculated as (weight of control plants – weight of infested plants)/weight of control plants; a negative value indicates a gain in weight after exposure to insects  
2: Numbers are means ± SEM; lowercase letters indicate homogenous groups based on Tukey tests (P > 0.05), results indicated in bold font are significantly less affected by planthoppers than the susceptible check TN1 based on Duncan’s many-to-one tests (P > 0.05)  
3: Damage ratings are based on the standard evaluations system (SES) for bulk tests as outlined in Table 1  
4: DF = 15,80; \*\*\* = P ≤ 0.005 (N = 6)

**Table S6:** Results from nymph Survival<sub>20,4n</sub> test with 16 varieties. The Survival<sub>20,4n</sub> test is a performance test that corresponds to the MSST<sub>20,4n</sub>.

| Rice line     | Plant weight<br>(mg)(control) <sup>2</sup> | Plant weight<br>(mg)(infested) <sup>2</sup> | Plant weight<br>loss<br>(proportion) | Survival<br>(proportion) <sup>2</sup> | Development (proportion at each life stage) |                        |                        |                               | Female<br>(proportion) | Male long-<br>winged<br>(proportion) | Pooled<br>planthopper<br>weight (mg) |
|---------------|--------------------------------------------|---------------------------------------------|--------------------------------------|---------------------------------------|---------------------------------------------|------------------------|------------------------|-------------------------------|------------------------|--------------------------------------|--------------------------------------|
|               |                                            |                                             |                                      |                                       | 3 <sup>rd</sup> instar                      | 4 <sup>th</sup> instar | 5 <sup>th</sup> instar | Adult                         |                        |                                      |                                      |
| Rathu Heenati | 1.04±0.13 <sup>ab</sup>                    | 0.99±0.05                                   | <b>-0.03±0.14</b> <sup>a</sup>       | 0.75±0.08                             | 0.02±0.02                                   | 0.20±0.09              | 0.23±0.08              | <b>0.55±0.16</b> <sup>a</sup> | 0.22±0.11              | 0.86±0.10                            | <b>2.45±0.89</b> <sup>a</sup>        |
| IR62          | 0.99±0.03 <sup>ab</sup>                    | 0.81±0.08                                   | 0.18±0.08 <sup>ab</sup>              | 0.92±0.04                             | 0.00±0.00                                   | 0.00±0.00              | 0.13±0.13              | 0.88±0.13 <sup>b</sup>        | 0.43±0.12              | 1.00±0.00                            | <b>3.30±0.18</b> <sup>ab</sup>       |
| PTB33         | 1.05±0.05 <sup>ab</sup>                    | 1.04±0.07                                   | <b>0.01±0.06</b> <sup>ab</sup>       | 0.73±0.11                             | 0.00±0.00                                   | 0.06±0.04              | 0.04±0.04              | 0.90±0.08 <sup>b</sup>        | 0.60±0.09              | 1.00±0.00                            | 3.66±0.91 <sup>ab</sup>              |
| IR65482-4     | 1.01±0.07 <sup>ab</sup>                    | 0.77±0.06                                   | 0.21±0.08 <sup>ab</sup>              | 0.88±0.06                             | 0.00±0.00                                   | 0.00±0.00              | 0.02±0.02              | 0.98±0.02 <sup>b</sup>        | 0.60±0.13              | 1.00±0.00                            | 3.80±0.81 <sup>ab</sup>              |
| Triveni       | 0.98±0.08 <sup>ab</sup>                    | 0.76±0.03                                   | 0.21±0.05 <sup>ab</sup>              | 0.79±0.11                             | 0.00±0.00                                   | 0.02±0.02              | 0.00±0.00              | 0.98±0.02 <sup>b</sup>        | 0.71±0.08              | 1.00±0.00                            | 5.81±1.39 <sup>bc</sup>              |
| IR46          | 0.93±0.06 <sup>ab</sup>                    | 0.74±0.05                                   | 0.20±0.04 <sup>ab</sup>              | 0.81±0.06                             | 0.00±0.00                                   | 0.00±0.00              | 0.00±0.00              | 1.00±0.00 <sup>b</sup>        | 0.67±0.04              | 0.69±0.16                            | 6.37±0.70 <sup>bc</sup>              |
| Mudgo         | 1.28±0.06 <sup>b</sup>                     | 1.02±0.04                                   | 0.19±0.05 <sup>ab</sup>              | 0.92±0.04                             | 0.00±0.00                                   | 0.00±0.00              | 0.00±0.00              | 1.00±0.00 <sup>b</sup>        | 0.57±0.08              | 1.00±0.00                            | 4.83±0.90 <sup>abc</sup>             |
| IR65482-7     | 0.93±0.05 <sup>ab</sup>                    | 0.86±0.03                                   | <b>0.05±0.05</b> <sup>ab</sup>       | 0.81±0.14                             | 0.00±0.00                                   | 0.00±0.00              | 0.00±0.00              | 1.00±0.00 <sup>b</sup>        | 0.66±0.09              | 0.79±0.09                            | 5.43±1.42 <sup>abc</sup>             |
| IR40          | 0.82±0.11 <sup>a</sup>                     | 0.58±0.09                                   | 0.28±0.05 <sup>ab</sup>              | 0.71±0.11                             | 0.00±0.00                                   | 0.00±0.00              | 0.00±0.00              | 1.00±0.00 <sup>b</sup>        | 0.47±0.12              | 0.77±0.12                            | 5.14±1.11 <sup>abc</sup>             |
| Utri Rajapan  | 1.10±0.09 <sup>ab</sup>                    | 1.00±0.13                                   | 0.09±0.10 <sup>ab</sup>              | 0.88±0.06                             | 0.00±0.00                                   | 0.00±0.00              | 0.00±0.00              | 1.00±0.00 <sup>b</sup>        | 0.67±0.12              | 0.78±0.15                            | 7.19±1.40 <sup>c</sup>               |
| TKM6          | 1.08±0.04 <sup>ab</sup>                    | 0.79±0.06                                   | 0.26±0.07 <sup>ab</sup>              | 0.88±0.06                             | 0.00±0.00                                   | 0.00±0.00              | 0.00±0.00              | 1.00±0.00 <sup>b</sup>        | 0.56±0.06              | 0.87±0.06                            | 6.56±0.58 <sup>bc</sup>              |
| ASD7          | 1.19±0.20 <sup>ab</sup>                    | 0.86±0.15                                   | 0.29±0.04 <sup>ab</sup>              | 0.79±0.06                             | 0.00±0.00                                   | 0.00±0.00              | 0.00±0.00              | 1.00±0.00 <sup>b</sup>        | 0.51±0.13              | 0.93±0.07                            | 6.17±1.18 <sup>bc</sup>              |
| Asominori     | 0.85±0.06 <sup>ab</sup>                    | 0.57±0.02                                   | 0.31±0.05 <sup>ab</sup>              | 0.98±0.02                             | 0.00±0.00                                   | 0.00±0.00              | 0.00±0.00              | 1.00±0.00 <sup>b</sup>        | 0.54±0.09              | 0.89±0.07                            | 5.13±0.80 <sup>abc</sup>             |
| IR22          | 0.91±0.12 <sup>ab</sup>                    | 0.71±0.06                                   | 0.19±0.06 <sup>ab</sup>              | 0.85±0.07                             | 0.00±0.00                                   | 0.00±0.00              | 0.02±0.02              | 0.98±0.02 <sup>b</sup>        | 0.43±0.07              | 0.97±0.03                            | 5.48±1.00 <sup>abc</sup>             |
| T65           | 0.82±0.06 <sup>a</sup>                     | 0.60±0.06                                   | 0.24±0.08 <sup>ab</sup>              | 0.92±0.05                             | 0.00±0.00                                   | 0.00±0.00              | 0.00±0.00              | 1.00±0.00 <sup>b</sup>        | 0.47±0.06              | 0.87±0.06                            | 5.49±0.56 <sup>abc</sup>             |
| TN1           | 1.09±0.06 <sup>ab</sup>                    | 0.68±0.09                                   | 0.36±0.09 <sup>b</sup>               | 0.90±0.04                             | 0.00±0.00                                   | 0.00±0.00              | 0.00±0.00              | 1.00±0.00 <sup>b</sup>        | 0.60±0.05              | 0.86±0.09                            | 7.09±0.73 <sup>c</sup>               |
| F-rice line   | 2.095*                                     |                                             | 2.937***                             | 1.073ns                               | -                                           | -                      | -                      | 5.020***                      | 1.318ns                | 1.469ns                              | 2.155*                               |
| F-covariate   |                                            |                                             | 12.188***                            |                                       |                                             |                        |                        |                               |                        |                                      | 6.116*                               |

1: Plant weight loss is calculated as (weight of control plants – weight of infested plants)/weight of control plants  
2: Numbers are means ± SEM; lowercase letters indicate homogenous groups based on Tukey tests (P > 0.05); results indicated in bold font are significantly less affected by planthoppers than the susceptible check TN1 based on Duncan’s many-to-one tests (P > 0.05)  
3: DF = 15,80 or 15,79 where the covariate plant weight had a significant effect; \*\*\* = P ≤ 0.005, \* = P ≤ 0.05, ns = P ≥ 0.05; - = no test due to insufficient variability; (N = 6)

**Table S7:** Results from Build-up<sub>20.4f</sub> test. The Build-up<sub>20.4f</sub> is a performance test that corresponds to the MSST<sub>20.4n</sub>.

| Rice line    | Plant weight<br>(mg)(control) <sup>2</sup> | Plant weight<br>(mg)(infested) <sup>2</sup> | Plant weight<br>loss (proportion) | Development (proportion at each life stage) |                        |                        |                        | Number of<br>planthoppers       | Pooled planthopper<br>weight (mg) |
|--------------|--------------------------------------------|---------------------------------------------|-----------------------------------|---------------------------------------------|------------------------|------------------------|------------------------|---------------------------------|-----------------------------------|
|              |                                            |                                             |                                   | 1 <sup>st</sup> instar                      | 2 <sup>nd</sup> instar | 3 <sup>rd</sup> instar | 4 <sup>th</sup> instar |                                 |                                   |
| Rathu        | 0.92±0.10 <sup>ab</sup>                    |                                             | 0.29±0.15 <sup>abc</sup>          | <b>0.68±0.16<sup>b</sup></b>                | 0.16±0.06              | 0.15±0.12              | 0.00±0.00              | <b>92.50±42.30<sup>ab</sup></b> | <b>2.38±1.23<sup>a</sup></b>      |
| Heenati      |                                            | 0.60±0.09                                   |                                   |                                             |                        |                        |                        |                                 |                                   |
| IR62         | 0.93±0.09 <sup>ab</sup>                    | 0.63±0.08                                   | 0.30±0.09 <sup>abc</sup>          | 0.51±0.06 <sup>ab</sup>                     | 0.35±0.03              | 0.13±0.05              | 0.01±0.01              | 281.17±69.14 <sup>abc</sup>     | 5.14±1.10 <sup>ab</sup>           |
| PTB33        | 0.87±0.09 <sup>ab</sup>                    | 0.69±0.11                                   | <b>0.18±0.13<sup>a</sup></b>      | <b>0.62±0.13<sup>b</sup></b>                | 0.34±0.14              | 0.04±0.03              | 0.00±0.00              | 145.33±40.37 <sup>abc</sup>     | <b>2.40±0.54<sup>a</sup></b>      |
| IR65482-4    | 0.91±0.10 <sup>ab</sup>                    | 0.68±0.09                                   | 0.21±0.13 <sup>ab</sup>           | 0.43±0.11 <sup>a</sup>                      | 0.34±0.08              | 0.22±0.14              | 0.01±0.01              | 129.33±45.61 <sup>abc</sup>     | 3.47±1.06 <sup>ab</sup>           |
| Triveni      | 0.77±0.05 <sup>ab</sup>                    | 0.29±0.03                                   | 0.62±0.03 <sup>bc</sup>           | 0.52±0.07 <sup>ab</sup>                     | 0.31±0.03              | 0.14±0.04              | 0.04±0.02              | 316.33±63.67 <sup>abc</sup>     | 7.17±1.45 <sup>ab</sup>           |
| IR46         | 0.86±0.14 <sup>ab</sup>                    | 0.44±0.08                                   | 0.45±0.12 <sup>abc</sup>          | 0.33±0.07 <sup>a</sup>                      | 0.30±0.06              | 0.33±0.12              | 0.04±0.02              | 298.50±49.39 <sup>abc</sup>     | 8.81±1.28 <sup>ab</sup>           |
| Mudgo        | 0.95±0.06 <sup>ab</sup>                    | 0.64±0.06                                   | 0.32±0.05 <sup>abc</sup>          | 0.37±0.06 <sup>a</sup>                      | 0.42±0.06              | 0.19±0.04              | 0.03±0.01              | 331.00±40.69 <sup>abc</sup>     | 11.57±1.61 <sup>ab</sup>          |
| IR65482-7    | 0.93±0.16 <sup>ab</sup>                    | 0.40±0.05                                   | 0.45±0.13 <sup>abc</sup>          | 0.39±0.07 <sup>a</sup>                      | 0.41±0.05              | 0.18±0.06              | 0.02±0.01              | 364.83±68.69 <sup>bc</sup>      | 11.56±3.50 <sup>ab</sup>          |
| IR40         | 0.60±0.08 <sup>a</sup>                     | 0.17±0.03                                   | 0.62±0.15 <sup>bc</sup>           | 0.46±0.09 <sup>a</sup>                      | 0.31±0.03              | 0.20±0.06              | 0.03±0.02              | 409.33±58.59 <sup>c</sup>       | 10.30±2.68 <sup>ab</sup>          |
| Utri Rajapan | 1.09±0.15 <sup>b</sup>                     | 0.47±0.08                                   | 0.55±0.08 <sup>abc</sup>          | <b>0.67±0.09<sup>b</sup></b>                | 0.25±0.06              | 0.07±0.03              | 0.01±0.01              | 311.50±61.38 <sup>abc</sup>     | 6.40±1.35 <sup>ab</sup>           |
| TKM6         | 0.68±0.14 <sup>a</sup>                     | 0.32±0.04                                   | 0.34±0.26 <sup>abc</sup>          | 0.53±0.10 <sup>ab</sup>                     | 0.37±0.09              | 0.09±0.03              | 0.01±0.01              | 398.51±75.31 <sup>c</sup>       | 10.65±2.08 <sup>ab</sup>          |
| ASD7         | 1.11±0.11 <sup>b</sup>                     | 0.42±0.03                                   | 0.58±0.08 <sup>abc</sup>          | 0.47±0.11 <sup>a</sup>                      | 0.33±0.05              | 0.18±0.07              | 0.01±0.01              | 394.50±53.04 <sup>c</sup>       | 10.10±2.49 <sup>ab</sup>          |
| Asominori    | 0.75±0.09 <sup>a</sup>                     | 0.37±0.09                                   | 0.50±0.11 <sup>abc</sup>          | <b>0.73±0.10<sup>b</sup></b>                | 0.21±0.07              | 0.05±0.03              | 0.01±0.01              | 136.17±23.62 <sup>abc</sup>     | <b>2.67±0.69<sup>a</sup></b>      |
| IR22         | 0.99±0.10 <sup>ab</sup>                    | 0.35±0.06                                   | 0.63±0.07 <sup>c</sup>            | 0.43±0.09 <sup>a</sup>                      | 0.30±0.03              | 0.24±0.08              | 0.03±0.01              | 410.50±82.30 <sup>c</sup>       | 12.76±4.13 <sup>b</sup>           |
| T65          | 0.63±0.08 <sup>a</sup>                     | 0.35±0.06                                   | 0.40±0.14 <sup>abc</sup>          | <b>0.61±0.09<sup>b</sup></b>                | 0.37±0.09              | 0.02±0.01              | 0.00±0.00              | <b>77.50±32.81<sup>a</sup></b>  | <b>1.64±0.64<sup>a</sup></b>      |
| TN1          | 0.90±0.04 <sup>ab</sup>                    | 0.45±0.04                                   | 0.50±0.04 <sup>abc</sup>          | 0.47±0.07 <sup>a</sup>                      | 0.34±0.06              | 0.15±0.03              | 0.04±0.01              | 337.33±64.17 <sup>abc</sup>     | 10.64±1.80 <sup>ab</sup>          |
| F-rice line  | 2.053*                                     |                                             | 2.410**                           | 1.8228*                                     | 0.772ns                | 1.349ns                | 1.537ns                | 4.435***                        | 3.856***                          |
| F-covariate  |                                            |                                             | 27.717***                         |                                             |                        |                        |                        |                                 |                                   |

1: Plant weight loss is calculated as (weight of control plants – weight of infested plants)/weight of control plants  
2: Numbers are means ± SEM; lowercase letters indicate homogenous groups based on Tukey tests (P > 0.05); results indicated in bold font are significantly less affected by planthoppers than the susceptible check TN1 based on Duncan’s many-to-one tests (P > 0.05)  
3: DF = 15,80 or 15,79 where the covariate plant weight had a significant effect; \*\*\* = P ≤ 0.005, \* = P ≤ 0.05, ns = P ≥ 0.05; - = no test due to insufficient variability; (N = 6)



**Table S8:** Adult longevity on 16 rice lines according to the Survival<sub>20.5f</sub> test. The Survival<sub>20.5f</sub> test is a performance test that corresponds to the MSST<sub>20.4n</sub> test.

| Rice line                | Plant weight (mg)(control) <sup>2</sup> | Plant weight (mg)(infested) <sup>2</sup> | Plant weight loss (g)   | Time to 50% dead (days)       | Time to 100% dead (days)       |
|--------------------------|-----------------------------------------|------------------------------------------|-------------------------|-------------------------------|--------------------------------|
| Rathu Heenati            | 1.82±0.10 <sup>ab</sup>                 | 1.61±0.15                                | 0.11±0.08 <sup>ab</sup> | <b>8.17±2.91 <sup>a</sup></b> | <b>14.17±3.00 <sup>a</sup></b> |
| IR62                     | 2.24±0.12 <sup>b</sup>                  | 2.03±0.18                                | 0.09±0.06 <sup>ab</sup> | 16.00±3.00 <sup>abc</sup>     | 21.50±1.45 <sup>b</sup>        |
| PTB33                    | 1.87±0.12 <sup>ab</sup>                 | 1.89±0.10                                | -0.03±0.07 <sup>a</sup> | 18.83±0.83 <sup>bc</sup>      | 23.00±1.26 <sup>b</sup>        |
| IR65482-4                | 2.15±0.13 <sup>ab</sup>                 | 2.00±0.10                                | 0.05±0.07 <sup>ab</sup> | 23.17±0.17 <sup>c</sup>       | 26.50±0.56 <sup>b</sup>        |
| Triveni                  | 1.65±0.23 <sup>ab</sup>                 | 1.47±0.11                                | 0.02±0.14 <sup>ab</sup> | 18.17±1.19 <sup>bc</sup>      | 23.67±1.58 <sup>b</sup>        |
| IR46                     | 2.16±0.06 <sup>ab</sup>                 | 1.67±0.16                                | 0.22±0.08 <sup>ab</sup> | 21.17±0.79 <sup>bc</sup>      | 25.00±1.37 <sup>b</sup>        |
| Mudgo                    | 1.99±0.05 <sup>ab</sup>                 | 1.68±0.10                                | 0.15±0.06 <sup>ab</sup> | 19.00±1.24 <sup>bc</sup>      | 26.83±1.11 <sup>b</sup>        |
| IR65482-7                | 1.92±0.15 <sup>ab</sup>                 | 1.67±0.14                                | 0.11±0.08 <sup>ab</sup> | 19.83±1.72 <sup>bc</sup>      | 26.17±1.05 <sup>b</sup>        |
| IR40                     | 1.85±0.08 <sup>ab</sup>                 | 1.21±0.19                                | 0.35±0.10 <sup>ab</sup> | 20.33±0.92 <sup>bc</sup>      | 24.17±0.48 <sup>b</sup>        |
| Utri Rajapan             | 1.84±0.19 <sup>ab</sup>                 | 1.62±0.16                                | 0.04±0.18 <sup>ab</sup> | 20.83±1.08 <sup>bc</sup>      | 23.83±1.35 <sup>b</sup>        |
| TKM6                     | 1.54±0.19 <sup>a</sup>                  | 1.30±0.22                                | 0.05±0.25 <sup>ab</sup> | 18.17±1.35 <sup>bc</sup>      | 25.33±1.20 <sup>b</sup>        |
| ASD7                     | 1.90±0.10 <sup>ab</sup>                 | 1.96±0.07                                | -0.05±0.08 <sup>a</sup> | 20.00±1.51 <sup>bc</sup>      | 25.83±1.74 <sup>b</sup>        |
| Asominori                | 2.14±0.14 <sup>ab</sup>                 | 1.55±0.21                                | 0.27±0.09 <sup>ab</sup> | 20.33±1.78 <sup>bc</sup>      | 23.00±1.13 <sup>b</sup>        |
| IR22                     | 2.19±0.13 <sup>ab</sup>                 | 1.86±0.17                                | 0.15±0.07 <sup>ab</sup> | 20.00±2.16 <sup>bc</sup>      | 28.17±0.60 <sup>b</sup>        |
| T65                      | 1.66±0.09 <sup>ab</sup>                 | 0.68±0.16                                | 0.56±0.13 <sup>b</sup>  | 20.00±1.03 <sup>bc</sup>      | 27.67±0.61 <sup>b</sup>        |
| TN1                      | 1.90±0.20 <sup>ab</sup>                 | 1.41±0.19                                | 0.19±0.17 <sup>ab</sup> | 14.83±1.96 <sup>abc</sup>     | 23.30±2.11 <sup>b</sup>        |
| F-rice line <sup>3</sup> | 2.237*                                  |                                          | 3.346***                | 4.396***                      | 5.246***                       |
| F-covariate <sup>3</sup> |                                         |                                          | 38.076***               |                               |                                |

1: Plant weight loss is calculated as (weight of control plants – weight of infested plants)/weight of control plants  
2: Numbers are means ± SEM; lowercase letters indicate homogenous groups based on Tukey tests (P > 0.05); results indicated in bold font are significantly less affected by planthoppers than the susceptible check TN1 based on Duncan’s many-to-one tests (P > 0.05)  
3: DF = 15,80 or 15,79 where the covariate plant weight had a significant effect; \*\*\* = P ≤ 0.005, \* = P ≤ 0.05; (N = 6)

**Table S9:** Honeydew production on 16 rice lines based on the Honeydew<sub>20.2f</sub> test. The honeydew test is a performance test designed to assess relative feeding capacities of planthoppers on different rice varieties/lines

| Rice line     | Total area of honeydew (mm <sup>2</sup> ) | Total number of honeydew spots | Area of phloem-derived honeydew (mm <sup>2</sup> ) | Total phloem-derived spots | Area of xylem-derived honeydew (mm <sup>2</sup> ) | Total xylem-derived spots | Xylem honeydew as a proportion of total |
|---------------|-------------------------------------------|--------------------------------|----------------------------------------------------|----------------------------|---------------------------------------------------|---------------------------|-----------------------------------------|
| Rathu Heenati | <b>0.49±0.09</b> <sup>a</sup>             | 18.17±4.13 <sup>ab</sup>       | <b>0.22±0.08</b> <sup>a</sup>                      | 3.67±1.41                  | 0.28±0.10 <sup>abc</sup>                          | 14.50±5.28 <sup>abc</sup> | <b>0.52±0.18</b> <sup>ab</sup>          |
| IR62          | <b>0.47±0.04</b> <sup>a</sup>             | 16.33±2.56 <sup>ab</sup>       | <b>0.23±0.06</b> <sup>a</sup>                      | 4.67±1.48                  | 0.24±0.05 <sup>abc</sup>                          | 11.67±2.95 <sup>abc</sup> | <b>0.52±0.13</b> <sup>ab</sup>          |
| PTB33         | <b>0.60±0.03</b> <sup>a</sup>             | 21.67±4.26 <sup>ab</sup>       | <b>0.16±0.06</b> <sup>a</sup>                      | 2.17±0.87                  | <b>0.44±0.06</b> <sup>bc</sup>                    | 19.50±3.69 <sup>c</sup>   | <b>0.74±0.10</b> <sup>b</sup>           |
| IR65482-4     | <b>0.33±0.06</b> <sup>a</sup>             | 10.17±1.70 <sup>ab</sup>       | <b>0.16±0.05</b> <sup>a</sup>                      | 3.67±1.05                  | 0.17±0.07 <sup>abc</sup>                          | 6.50±2.33 <sup>ab</sup>   | <b>0.45±0.14</b> <sup>ab</sup>          |
| Triveni       | <b>1.21±0.19</b> <sup>a</sup>             | 19.83±3.05 <sup>ab</sup>       | <b>0.81±0.23</b> <sup>a</sup>                      | 4.67±1.28                  | <b>0.40±0.10</b> <sup>bc</sup>                    | 15.17±2.87 <sup>abc</sup> | 0.38±0.10 <sup>ab</sup>                 |
| IR46          | <b>1.59±0.45</b> <sup>ab</sup>            | 11.00±1.46 <sup>ab</sup>       | <b>1.45±0.47</b> <sup>ab</sup>                     | 5.33±1.86                  | 0.14±0.03 <sup>abc</sup>                          | 5.67±0.99 <sup>a</sup>    | 0.12±0.03 <sup>a</sup>                  |
| Mudgo         | 2.33±0.72 <sup>ab</sup>                   | 16.00±3.76 <sup>ab</sup>       | 2.15±0.68 <sup>ab</sup>                            | 5.33±1.56                  | 0.18±0.06 <sup>abc</sup>                          | 10.67±3.81 <sup>abc</sup> | 0.08±0.02 <sup>a</sup>                  |
| IR65482-7     | <b>1.33±0.41</b> <sup>ab</sup>            | 7.00±1.29 <sup>a</sup>         | <b>1.27±0.41</b> <sup>ab</sup>                     | 3.67±0.61                  | 0.06±0.02 <sup>a</sup>                            | 3.33±1.52 <sup>a</sup>    | 0.05±0.02 <sup>a</sup>                  |
| IR40          | 2.09±0.53 <sup>ab</sup>                   | 13.67±3.56 <sup>ab</sup>       | 1.93±0.55 <sup>ab</sup>                            | 3.83±0.70                  | 0.16±0.05 <sup>abc</sup>                          | 9.83±3.42 <sup>abc</sup>  | 0.11±0.04 <sup>a</sup>                  |
| Utri Rajapan  | <b>1.42±0.32</b> <sup>ab</sup>            | 11.33±1.09 <sup>ab</sup>       | <b>1.26±0.31</b> <sup>ab</sup>                     | 4.50±0.56                  | 0.17±0.02 <sup>abc</sup>                          | 6.83±0.87 <sup>ab</sup>   | 0.14±0.02 <sup>a</sup>                  |
| TKM6          | <b>0.94±0.08</b> <sup>a</sup>             | 18.00±3.97 <sup>ab</sup>       | <b>0.48±0.18</b> <sup>a</sup>                      | 3.50±1.50                  | <b>0.46±0.17</b> <sup>c</sup>                     | 14.50±4.71 <sup>abc</sup> | <b>0.49±0.17</b> <sup>ab</sup>          |
| ASD7          | 1.81±0.27 <sup>ab</sup>                   | 19.00±3.42 <sup>ab</sup>       | <b>1.64±0.30</b> <sup>ab</sup>                     | 6.50±1.57                  | 0.17±0.03 <sup>abc</sup>                          | 12.50±3.08 <sup>abc</sup> | 0.12±0.03 <sup>a</sup>                  |
| Asominori     | <b>1.51±0.29</b> <sup>ab</sup>            | 24.17±5.76 <sup>b</sup>        | <b>1.32±0.27</b> <sup>ab</sup>                     | 6.50±1.59                  | 0.19±0.03 <sup>abc</sup>                          | 17.67±5.74 <sup>bc</sup>  | 0.13±0.01 <sup>a</sup>                  |
| IR22          | 2.11±0.64 <sup>ab</sup>                   | 13.33±4.22 <sup>ab</sup>       | 2.01±0.64 <sup>ab</sup>                            | 3.17±0.70                  | 0.10±0.03 <sup>ab</sup>                           | 10.17±4.59 <sup>abc</sup> | 0.08±0.02 <sup>a</sup>                  |
| T65           | 2.35±0.74 <sup>ab</sup>                   | 13.00±3.14 <sup>ab</sup>       | 2.20±0.75 <sup>ab</sup>                            | 4.67±1.02                  | 0.15±0.04 <sup>abc</sup>                          | 8.33±2.46 <sup>abc</sup>  | 0.10±0.03 <sup>a</sup>                  |
| TN1           | 3.32±0.56 <sup>b</sup>                    | 8.33±3.03 <sup>ab</sup>        | 3.21±0.56 <sup>b</sup>                             | 3.17±0.31                  | 0.11±0.04 <sup>ab</sup>                           | 5.17±2.83 <sup>a</sup>    | 0.04±0.02 <sup>a</sup>                  |
| F-rice line   | 3.965***                                  | 2.093*                         | 4.588***                                           | 0.969ns                    | 3.203***                                          | 1.806*                    | 4.673***                                |

1: Numbers are means ± SEM; lowercase letters indicate homogenous groups based on Tukey tests (P > 0.05); results indicated in bold font are significantly less affected by planthoppers than the susceptible check TN1 based on Duncan’s many-to-one tests (P > 0.05)

2: DF = 15,80; \*\*\* = P ≤ 0.005, \* = P ≤ 0.05 (N = 6)

**Table S10:** Results from Oviposition<sub>20.2f/m</sub> test on 16 rice lines

| Rice line     | Batches located<br>along midrib<br>(proportion) | Number of egg<br>batches      | Batch size<br>(number of<br>eggs) | Total number of<br>eggs             | Number of nymphs                  | Unhatched-fertile<br>eggs (proportion) | Unhatched-infertile<br>eggs (proportion) | Proportion of eggs<br>that were<br>unhatched |
|---------------|-------------------------------------------------|-------------------------------|-----------------------------------|-------------------------------------|-----------------------------------|----------------------------------------|------------------------------------------|----------------------------------------------|
| Rathu Heenati | 0.00±0.00 <sup>a</sup>                          | <b>3.83±2.01</b> <sup>a</sup> | 39.10±14.97                       | <b>86.67±43.18</b> <sup>a</sup>     | <b>69.83±27.88</b> <sup>a</sup>   | 0.03±0.03                              | 0.00±0.00 <sup>a</sup>                   | 0.03±0.03 <sup>a</sup>                       |
| IR62          | 0.00±0.00 <sup>a</sup>                          | <b>5.50±2.92</b> <sup>a</sup> | 19.75±2.98                        | <b>100.17±55.32</b> <sup>ab</sup>   | <b>92.67±50.43</b> <sup>a</sup>   | 0.01±0.01                              | 0.00±0.00 <sup>a</sup>                   | 0.01±0.01 <sup>a</sup>                       |
| PTB33         | 0.00±0.00 <sup>a</sup>                          | <b>4.67±2.72</b> <sup>a</sup> | 32.97±8.13                        | <b>115.33±50.40</b> <sup>ab</sup>   | <b>95.50±37.02</b> <sup>a</sup>   | 0.01±0.01                              | 0.02±0.02 <sup>ab</sup>                  | 0.04±0.03 <sup>a</sup>                       |
| IR65482-4     | 0.01±0.01 <sup>a</sup>                          | 11.00±3.06 <sup>ab</sup>      | 28.96±5.88                        | 262.67±64.34 <sup>abcd</sup>        | 230.00±59.07 <sup>ab</sup>        | 0.05±0.03                              | 0.01±0.01 <sup>ab</sup>                  | 0.06±0.03 <sup>ab</sup>                      |
| Triveni       | 0.00±0.00 <sup>a</sup>                          | 7.83±1.60 <sup>ab</sup>       | 42.26±9.29                        | 270.00±48.24 <sup>abcd</sup>        | 259.17±51.81 <sup>ab</sup>        | 0.02±0.01                              | 0.01±0.01 <sup>ab</sup>                  | 0.02±0.01 <sup>a</sup>                       |
| IR46          | 0.00±0.00 <sup>a</sup>                          | 18.17±9.12 <sup>ab</sup>      | 41.98±12.05                       | 350.83±60.01 <sup>abcd</sup>        | 283.50±15.15 <sup>ab</sup>        | 0.03±0.02                              | 0.03±0.02 <sup>ab</sup>                  | 0.06±0.04 <sup>ab</sup>                      |
| Mudgo         | 0.10±0.10 <sup>a</sup>                          | 18.83±6.67 <sup>ab</sup>      | 27.83±8.59                        | 329.67±68.47 <sup>abcd</sup>        | 217.67±41.51 <sup>ab</sup>        | 0.09±0.05                              | 0.03±0.02 <sup>abcd</sup>                | 0.12±0.05 <sup>abc</sup>                     |
| IR65482-7     | 0.08±0.04 <sup>b</sup>                          | 14.50±1.43 <sup>ab</sup>      | 21.01±2.97                        | 291.83±32.44 <sup>abcd</sup>        | 251.67±24.18 <sup>ab</sup>        | 0.03±0.02                              | 0.02±0.01 <sup>abcd</sup>                | 0.06±0.02 <sup>ab</sup>                      |
| IR40          | 0.01±0.01 <sup>a</sup>                          | 17.50±2.49 <sup>ab</sup>      | 23.75±4.37                        | 370.67±34.39 <sup>cd</sup>          | 339.17±30.39 <sup>b</sup>         | 0.02±0.01                              | 0.02±0.02 <sup>abcd</sup>                | 0.04±0.02 <sup>ab</sup>                      |
| Utri Rajapan  | 0.00±0.00 <sup>a</sup>                          | 8.83±2.52 <sup>ab</sup>       | 46.57±29.33                       | <b>187.67±52.02</b> <sup>abc</sup>  | <b>159.17±40.22</b> <sup>ab</sup> | 0.05±0.03                              | 0.00±0.00 <sup>a</sup>                   | 0.05±0.03 <sup>ab</sup>                      |
| TKM6          | 0.00±0.00 <sup>a</sup>                          | 22.00±4.23 <sup>ab</sup>      | 12.71±2.14                        | <b>243.00±29.03</b> <sup>abcd</sup> | <b>219.40±23.99</b> <sup>ab</sup> | 0.03±0.01                              | 0.01±0.01 <sup>abcd</sup>                | 0.05±0.01 <sup>ab</sup>                      |
| ASD7          | 0.14±0.06 <sup>b</sup>                          | 15.33±2.87 <sup>ab</sup>      | 18.99±3.01                        | <b>266.83±45.15</b> <sup>abcd</sup> | <b>164.17±30.60</b> <sup>ab</sup> | 0.09±0.04                              | 0.08±0.04 <sup>bcd</sup>                 | 0.17±0.04 <sup>bcd</sup>                     |
| Asominori     | 0.00±0.00 <sup>a</sup>                          | 21.50±4.26 <sup>ab</sup>      | 13.19±1.36                        | <b>266.83±45.37</b> <sup>abcd</sup> | <b>94.17±34.28</b> <sup>a</sup>   | 0.09±0.03                              | 0.25±0.05 <sup>d</sup>                   | <b>0.35±0.05</b> <sup>d</sup>                |
| IR22          | 0.06±0.04 <sup>ab</sup>                         | 22.17±5.09 <sup>ab</sup>      | 30.96±13.93                       | 388.17±58.86 <sup>cd</sup>          | 346.50±55.58 <sup>b</sup>         | 0.01±0.01                              | 0.04±0.02 <sup>abcd</sup>                | 0.05±0.02 <sup>ab</sup>                      |
| T65           | 0.05±0.04 <sup>ab</sup>                         | 28.50±5.39 <sup>b</sup>       | 17.82±1.47                        | 496.17±100.07 <sup>cd</sup>         | <b>200.33±51.87</b> <sup>ab</sup> | 0.08±0.02                              | 0.18±0.05 <sup>cd</sup>                  | <b>0.26±0.06</b> <sup>cd</sup>               |
| TN1           | 0.05±0.03 <sup>ab</sup>                         | 21.83±3.18 <sup>ab</sup>      | 22.17±3.04                        | 442.00±33.14 <sup>d</sup>           | 359.00±33.06 <sup>b</sup>         | 0.04±0.01                              | 0.04±0.02 <sup>abcd</sup>                | 0.08±0.03 <sup>ab</sup>                      |
| F-line        | 2.787***                                        | 2.845***                      | 1.040ns                           | 5.058***                            | 5.285***                          | 1.686ns                                | 5.203***                                 | 4.526***                                     |

1: Numbers are means ± SEM; lowercase letters indicate homogenous groups based on Tukey tests ( $P > 0.05$ ); results indicated in bold font are significantly less affected by planthoppers than the susceptible check TN1 based on Duncan’s many-to-one tests ( $P > 0.05$ )

2: DF = 15,80 or 15,79 where the covariate plant weight had a significant effect; \*\*\* =  $P \leq 0.005$ , ns =  $P > 0.05$ ; (N = 6)

**Table S11:** Results from Days to Wilt (DTW<sub>30.25n</sub>) test indicating responses by planthoppers to 16 rice lines

| Rice line     | Number of planthoppers              | Development (proportion at each life stage) |                                   |                          |                        |                        |                                  | Proportion of adults that were female | Pooled dry weight of planthoppers (mg) |
|---------------|-------------------------------------|---------------------------------------------|-----------------------------------|--------------------------|------------------------|------------------------|----------------------------------|---------------------------------------|----------------------------------------|
|               |                                     | 1 <sup>st</sup> instar                      | 2 <sup>nd</sup> instar            | 3 <sup>rd</sup> instar   | 4 <sup>th</sup> instar | 5 <sup>th</sup> instar | Adult                            |                                       |                                        |
| Rathu Heenati | <b>147.50±82.81</b> <sup>ab</sup>   | <b>0.10±0.07</b> <sup>a</sup>               | <b>0.03±0.02</b> <sup>ab</sup>    | 0.07±0.04 <sup>a</sup>   | 0.08±0.04              | 0.10±0.03              | <b>0.62±0.12</b> <sup>d</sup>    | 0.64±0.09 <sup>d</sup>                | 54.85±21.08 <sup>ab</sup>              |
| IR62          | <b>109.30±78.70</b> <sup>a</sup>    | <b>0.31±0.23</b> <sup>ab</sup>              | <b>0.06±0.03</b> <sup>abc</sup>   | 0.07±0.05 <sup>a</sup>   | 0.20±0.11              | 0.09±0.05              | 0.28±0.12 <sup>abc</sup>         | 0.70±0.15 <sup>abc</sup>              | 69.05±54.12 <sup>ab</sup>              |
| PTB33         | <b>26.60±14.75</b> <sup>a</sup>     | <b>0.20±0.16</b> <sup>ab</sup>              | <b>0.01±0.01</b> <sup>a</sup>     | 0.10±0.06 <sup>ab</sup>  | 0.11±0.05              | 0.11±0.06              | <b>0.47±0.18</b> <sup>cd</sup>   | 0.48±0.21 <sup>cd</sup>               | <b>14.75±7.00</b> <sup>a</sup>         |
| IR65482-4     | <b>835.30±257.48</b> <sup>ab</sup>  | 0.51±0.10 <sup>b</sup>                      | <b>0.21±0.04</b> <sup>de</sup>    | 0.12±0.03 <sup>abc</sup> | 0.06±0.03              | 0.05±0.03              | 0.05±0.02 <sup>a</sup>           | 0.54±0.12 <sup>a</sup>                | 72.44±17.44 <sup>ab</sup>              |
| Triveni       | <b>377.36±75.45</b> <sup>ab</sup>   | <b>0.11±0.07</b> <sup>a</sup>               | <b>0.08±0.03</b> <sup>abcd</sup>  | 0.09±0.01 <sup>ab</sup>  | 0.13±0.04              | 0.14±0.03              | <b>0.45±0.08</b> <sup>bcd</sup>  | 0.53±0.06 <sup>bcd</sup>              | 88.03±29.78 <sup>ab</sup>              |
| IR46          | <b>510.30±120.45</b> <sup>ab</sup>  | <b>0.13±0.04</b> <sup>a</sup>               | <b>0.10±0.03</b> <sup>abcde</sup> | 0.13±0.03 <sup>abc</sup> | 0.14±0.03              | 0.16±0.03              | <b>0.34±0.09</b> <sup>abcd</sup> | 0.44±0.04 <sup>abcd</sup>             | 83.52±17.94 <sup>ab</sup>              |
| Mudgo         | <b>764.50±149.07</b> <sup>ab</sup>  | 0.11±0.04 <sup>a</sup>                      | 0.15±0.03 <sup>abcde</sup>        | 0.22±0.03 <sup>bc</sup>  | 0.17±0.02              | 0.15±0.02              | 0.20±0.06 <sup>ab</sup>          | 0.45±0.06 <sup>abc</sup>              | 106.84±18.23 <sup>ab</sup>             |
| IR65482-7     | <b>847.10±221.37</b> <sup>ab</sup>  | 0.10±0.04 <sup>a</sup>                      | 0.15±0.03 <sup>abcde</sup>        | 0.22±0.02 <sup>bc</sup>  | 0.22±0.03              | 0.18±0.03              | 0.13±0.04 <sup>ab</sup>          | 0.31±0.06 <sup>ab</sup>               | 96.02±23.20 <sup>ab</sup>              |
| IR40          | <b>1040.63±343.07</b> <sup>bc</sup> | 0.27±0.05 <sup>ab</sup>                     | 0.24±0.02 <sup>e</sup>            | 0.22±0.02 <sup>bc</sup>  | 0.14±0.03              | 0.10±0.02              | 0.03±0.02 <sup>a</sup>           | 0.35±0.15 <sup>a</sup>                | 64.26±16.90 <sup>ab</sup>              |
| Utri Rajapan  | <b>879.00±229.42</b> <sup>ab</sup>  | <b>0.12±0.05</b> <sup>a</sup>               | 0.13±0.04 <sup>abcde</sup>        | 0.20±0.02 <sup>abc</sup> | 0.18±0.03              | 0.18±0.03              | 0.19±0.06 <sup>ab</sup>          | 0.45±0.08 <sup>abc</sup>              | 99.63±14.22 <sup>b</sup>               |
| TKM6          | <b>540.40±133.26</b> <sup>ab</sup>  | 0.16±0.04 <sup>ab</sup>                     | 0.17±0.03 <sup>bcde</sup>         | 0.21±0.02 <sup>bc</sup>  | 0.16±0.02              | 0.13±0.02              | 0.16±0.05 <sup>ab</sup>          | 0.37±0.08 <sup>abc</sup>              | 63.88±13.15 <sup>ab</sup>              |
| ASD7          | <b>900.50±258.83</b> <sup>ab</sup>  | 0.26±0.08 <sup>ab</sup>                     | 0.20±0.03 <sup>cde</sup>          | 0.21±0.03 <sup>bc</sup>  | 0.12±0.02              | 0.11±0.02              | 0.11±0.05 <sup>ab</sup>          | 0.43±0.07 <sup>a</sup>                | 83.23±20.84 <sup>ab</sup>              |
| Asominori     | <b>447.50±94.30</b> <sup>ab</sup>   | 0.28±0.05 <sup>ab</sup>                     | 0.22±0.02 <sup>de</sup>           | 0.19±0.02 <sup>abc</sup> | 0.18±0.03              | 0.12±0.02              | 0.02±0.01 <sup>a</sup>           | 0.30±0.11 <sup>a</sup>                | <b>24.35±4.32</b> <sup>a</sup>         |
| IR22          | <b>500.60±144.19</b> <sup>ab</sup>  | 0.17±0.05 <sup>ab</sup>                     | 0.21±0.02 <sup>de</sup>           | 0.24±0.02 <sup>c</sup>   | 0.17±0.02              | 0.14±0.02              | 0.07±0.02 <sup>a</sup>           | 0.38±0.07 <sup>a</sup>                | 42.40±7.64 <sup>ab</sup>               |
| T65           | <b>445.20±148.58</b> <sup>ab</sup>  | 0.18±0.05 <sup>ab</sup>                     | 0.20±0.03 <sup>cde</sup>          | 0.21±0.02 <sup>bc</sup>  | 0.21±0.04              | 0.14±0.04              | 0.06±0.03 <sup>a</sup>           | 0.35±0.11 <sup>a</sup>                | <b>30.82±8.12</b> <sup>a</sup>         |
| TN1           | 1871.40±266.57 <sup>c</sup>         | 0.27±0.04 <sup>ab</sup>                     | 0.25±0.02 <sup>e</sup>            | 0.24±0.01 <sup>c</sup>   | 0.13±0.02              | 0.08±0.02              | 0.03±0.02 <sup>a</sup>           | 0.43±0.09 <sup>a</sup>                | 100.46±13.18 <sup>b</sup>              |
| F-value       | 5.807***                            | 2.211**                                     | 5.772***                          | 4.931***                 | 1.718*                 | 1.407ns                | 6.772***                         | 1.120ns                               | 2.441***                               |

1: Numbers are means ± SEM; lowercase letters indicate homogenous groups based on Tukey tests; results indicated in bold font are significantly less affected by planthoppers than the susceptible check TN1 based on Duncan’s many-to-one tests

2: DF = 15,144; \*\*\* = P ≤ 0.005, \*8 = P ≤ 0.01, \* = P ≤ 0.05, ns = P > 0.05 (N = 10)

**Table S12:** Results from Days to Wilt (DTW<sub>30.25n</sub>) test indicating responses by 16 rice lines to infestation by planthoppers

| Rice line    | Plant weight<br>(control g) | Plant weight<br>loss (g)        | Plant<br>weight loss<br>(proportion) | Weight of filled<br>grain (control<br>g) | Weight of<br>unfilled grain<br>(control g) | DTW (days)                     | Damage rating<br>(at 60 DAI)  | Plant yield loss<br>(proportion) | DTW (days)                     | Damage rating<br>(at 60 DAI)  |
|--------------|-----------------------------|---------------------------------|--------------------------------------|------------------------------------------|--------------------------------------------|--------------------------------|-------------------------------|----------------------------------|--------------------------------|-------------------------------|
| Rathu        | 27.69±2.91 <sup>def</sup>   | <b>0.23±0.35<sup>a</sup></b>    | <b>0.05±0.06<sup>a</sup></b>         | 0.64±0.43                                | 0.23±0.15                                  | >60.00 <sup>e</sup>            | <b>3.00±0.00<sup>a</sup></b>  | 0.23±0.19                        | >60.00 <sup>e</sup>            | <b>3.00±0.00<sup>a</sup></b>  |
| Heenati      |                             |                                 |                                      |                                          |                                            |                                |                               |                                  |                                |                               |
| IR62         | 14.87±1.97 <sup>abc</sup>   | <b>1.13±0.75<sup>a</sup></b>    | <b>0.10±0.03<sup>a</sup></b>         | 7.99±0.66 <sup>cd</sup>                  | 1.06±0.20 <sup>abc</sup>                   | >60.00 <sup>e</sup>            | <b>3.40±0.27<sup>a</sup></b>  | <b>0.10±0.08<sup>a</sup></b>     | >60.00 <sup>e</sup>            | <b>3.40±0.27<sup>a</sup></b>  |
| PTB33        | 33.44±2.91 <sup>f</sup>     | <b>0.59±0.59<sup>a</sup></b>    | <b>0.10±0.06<sup>a</sup></b>         | 0.59±0.59                                | 0.01±0.01                                  | >60.00 <sup>e</sup>            | <b>3.40±0.27<sup>a</sup></b>  | 0.33±0.33                        | >60.00 <sup>e</sup>            | <b>3.40±0.27<sup>a</sup></b>  |
| IR65482-4    | 12.99±1.35 <sup>ab</sup>    | <b>2.42±1.78<sup>ab</sup></b>   | <b>0.07±0.13<sup>a</sup></b>         | 7.67±0.77 <sup>d</sup>                   | 0.69±0.19 <sup>ab</sup>                    | >60.00 <sup>e</sup>            | <b>5.80±0.33<sup>b</sup></b>  | <b>0.18±0.20<sup>a</sup></b>     | >60.00 <sup>e</sup>            | <b>5.80±0.33<sup>b</sup></b>  |
| Triveni      | 9.03±0.87 <sup>a</sup>      | 6.80±1.20 <sup>bcd</sup>        | <b>0.10±0.12<sup>a</sup></b>         | 7.98±0.54 <sup>cd</sup>                  | 0.50±0.15 <sup>a</sup>                     | <b>56.30±1.56<sup>e</sup></b>  | <b>7.80±0.33<sup>cd</sup></b> | 0.81±0.14 <sup>b</sup>           | <b>56.30±1.56<sup>e</sup></b>  | <b>7.80±0.33<sup>cd</sup></b> |
| IR46         | 17.98±1.70 <sup>abcde</sup> | 5.04±1.01 <sup>abcd</sup>       | 0.57±0.05 <sup>b</sup>               | 5.04±1.01 <sup>abcd</sup>                | 1.27±0.31 <sup>abc</sup>                   | <b>54.40±1.99<sup>de</sup></b> | <b>7.20±0.63<sup>c</sup></b>  | 1.00±0.00 <sup>b</sup>           | <b>54.40±1.99<sup>de</sup></b> | <b>7.20±0.63<sup>c</sup></b>  |
| Mudgo        | 24.86±3.95 <sup>bcd</sup>   | <b>3.72±0.65<sup>abc</sup></b>  | 0.56±0.09 <sup>b</sup>               | 3.72±0.65 <sup>a</sup>                   | 1.50±0.32 <sup>bc</sup>                    | 45.30±1.14 <sup>bc</sup>       | 9.00±0.00 <sup>e</sup>        | 1.00±0.00 <sup>b</sup>           | 45.30±1.14 <sup>bc</sup>       | 9.00±0.00 <sup>e</sup>        |
| IR65482-7    | 13.86±1.26 <sup>ab</sup>    | 8.70±1.07 <sup>d</sup>          | 0.56±0.04 <sup>b</sup>               | 8.70±1.07 <sup>bcd</sup>                 | 0.31±0.08 <sup>a</sup>                     | 52.40±2.47 <sup>cde</sup>      | 8.20±0.33 <sup>cde</sup>      | 1.00±0.00 <sup>b</sup>           | 52.40±2.47 <sup>cde</sup>      | 8.20±0.33 <sup>cde</sup>      |
| IR40         | 16.82±2.09 <sup>abcd</sup>  | 8.77±0.82 <sup>d</sup>          | 0.66±0.04 <sup>b</sup>               | 8.77±0.82 <sup>d</sup>                   | 0.81±0.28 <sup>abc</sup>                   | 38.10±2.50 <sup>ab</sup>       | 9.00±0.00 <sup>e</sup>        | 1.00±0.00 <sup>b</sup>           | 38.10±2.50 <sup>ab</sup>       | 9.00±0.00 <sup>e</sup>        |
| Utri Rajapan | 29.33±2.63 <sup>ef</sup>    | <b>3.73±1.02<sup>abc</sup></b>  | 0.72±0.03 <sup>b</sup>               | 3.73±1.02 <sup>a</sup>                   | 1.28±0.30 <sup>abc</sup>                   | 47.40±3.02 <sup>cd</sup>       | 8.60±0.27 <sup>de</sup>       | 1.00±0.00 <sup>b</sup>           | 47.40±3.02 <sup>cd</sup>       | 8.60±0.27 <sup>de</sup>       |
| TKM6         | 19.77±3.30 <sup>abcde</sup> | <b>4.28±0.74<sup>abcd</sup></b> | 0.62±0.05 <sup>b</sup>               | 4.28±0.74 <sup>abc</sup>                 | 1.17±0.42 <sup>abc</sup>                   | 45.20±2.30 <sup>bc</sup>       | 9.00±0.00 <sup>e</sup>        | 1.00±0.00 <sup>b</sup>           | 45.20±2.30 <sup>bc</sup>       | 9.00±0.00 <sup>e</sup>        |
| ASD7         | 26.16±3.95 <sup>cdef</sup>  | <b>4.18±0.69<sup>abc</sup></b>  | 0.67±0.06 <sup>b</sup>               | 4.19±0.68 <sup>ab</sup>                  | 1.68±0.31 <sup>c</sup>                     | 45.90±1.91 <sup>bcd</sup>      | 9.00±0.00 <sup>e</sup>        | 0.99±0.01 <sup>b</sup>           | 45.90±1.91 <sup>bcd</sup>      | 9.00±0.00 <sup>e</sup>        |
| Asominori    | 9.86±1.38 <sup>a</sup>      | 6.09±0.72 <sup>bcd</sup>        | 0.50±0.05 <sup>b</sup>               | 6.57±0.75 <sup>abcd</sup>                | 0.38±0.11 <sup>a</sup>                     | 35.80±0.51 <sup>a</sup>        | 9.00±0.00 <sup>e</sup>        | 0.92±0.02 <sup>b</sup>           | 35.80±0.51 <sup>a</sup>        | 9.00±0.00 <sup>e</sup>        |
| IR22         | 18.90±2.80 <sup>abcde</sup> | 7.11±0.71 <sup>cd</sup>         | 0.70±0.04 <sup>b</sup>               | 7.11±0.71 <sup>abcd</sup>                | 0.86±0.24 <sup>abc</sup>                   | 45.60±1.89 <sup>bcd</sup>      | 9.00±0.00 <sup>e</sup>        | 1.00±0.00 <sup>b</sup>           | 45.60±1.89 <sup>bcd</sup>      | 9.00±0.00 <sup>e</sup>        |
| T65          | 15.74±2.30 <sup>abcd</sup>  | 4.56±0.51 <sup>abcd</sup>       | 0.66±0.04 <sup>b</sup>               | 4.56±0.51 <sup>abc</sup>                 | 0.35±0.13 <sup>a</sup>                     | 45.30±2.54 <sup>bc</sup>       | 9.00±0.00 <sup>e</sup>        | 1.00±0.00 <sup>b</sup>           | 45.30±2.54 <sup>bc</sup>       | 9.00±0.00 <sup>e</sup>        |
| TN1          | 12.20±1.84 <sup>a</sup>     | 7.87±0.65 <sup>cd</sup>         | 0.55±0.06 <sup>b</sup>               | 7.87±0.65 <sup>bcd</sup>                 | 1.19±0.60 <sup>abc</sup>                   | 34.70±1.86 <sup>a</sup>        | 9.00±0.00 <sup>e</sup>        | 1.00±0.00 <sup>b</sup>           | 34.70±1.86 <sup>a</sup>        | 9.00±0.00 <sup>e</sup>        |
| F-rice line  | 8.574***                    | 6.178***                        | 15.932***                            | 6.317***                                 | 2.300**                                    | 23.485***                      | 87.982***                     | 16.521***                        | 23.485***                      | 87.982***                     |

1: Plant weight loss is calculated as absolute weight loss ‘weight of control plants – weight of infested plants’ and as a proportion ‘(weight of control plants – weight of infested plants)/weight of control plants’ and yield loss as (yield of control plants – yield of infested plants)/yield of control plants.

2: Numbers are means ± SEM; lowercase letters indicate homogenous groups based on Tukey tests (P > 0.05); results indicated in bold font are significantly less affected by planthoppers than the susceptible check TN1 based on Duncan’s many-to-one tests (P > 0.05)

3: DF = 15,144 or 13,126 for yield comparisons (due to photo-period effect on grain production in Rathu Heenati and PTB33); \*\*\* = P ≤ 0.005, \*\* = P ≤ 0.01; (N = 10)

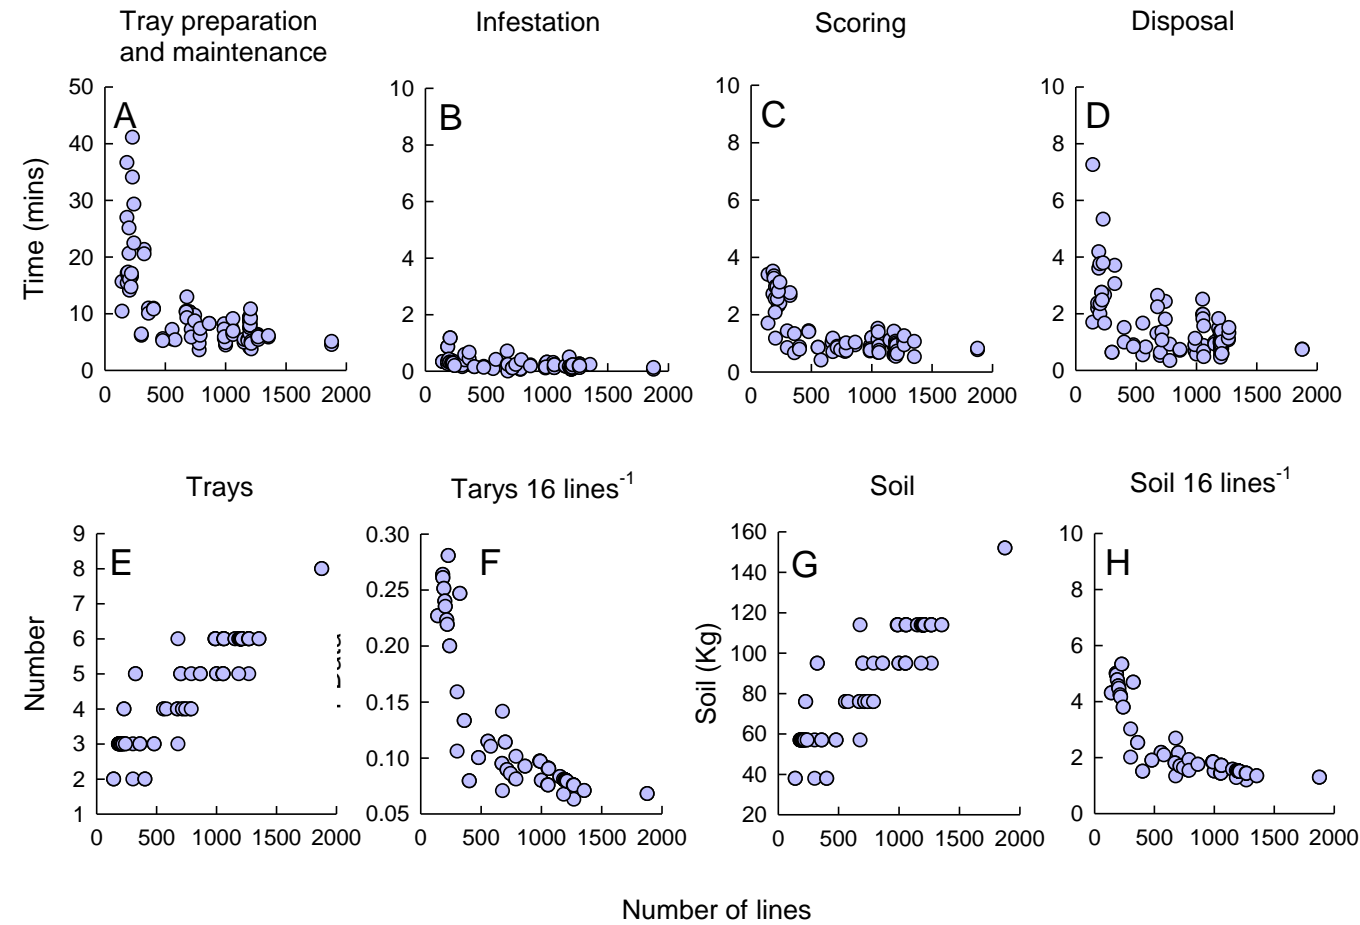

**Figure S1:** Time to process 16 rice lines during routine SSST with brown planthopper at IRRI. Graphs indicate the time (A) to prepare trays, (B) to infest the trays with planthoppers, (C) to score rice lines at the time that susceptible checks wilt and (D) for disposal of material after the SSST has been completed. Times are dependent on the number of lines evaluated during routine phenotyping (i.e., batch size/number of lines on x-axis). The number of trays required to test lines is indicated in (E) with the number of trays per 16 lines in (F). The amount of soil required for screening is presented in (G), with soil per 16 lines in (H).

**Table S13:** Estimated costs and time for processing materials during 11 phenotyping tests (see Figure 6). Details of each of the phenotyping tests are presented in Table 1

| Test                           | Scoring using SES                        |                                                |                                       |                                            | Added times for assessment of resistance |                                     |                                 | Added costs and times for assessment of plant tolerance |                                             |                                    |                                            |                                                         |
|--------------------------------|------------------------------------------|------------------------------------------------|---------------------------------------|--------------------------------------------|------------------------------------------|-------------------------------------|---------------------------------|---------------------------------------------------------|---------------------------------------------|------------------------------------|--------------------------------------------|---------------------------------------------------------|
|                                | Material<br>s costs<br>(\$) <sup>1</sup> | Space<br>(m <sup>2</sup><br>days) <sup>2</sup> | Set-up<br>time<br>(mins) <sup>4</sup> | Evaluatio<br>n time<br>(mins) <sup>5</sup> | Counts<br>(mins) <sup>3</sup>            | Developme<br>nt (mins) <sup>3</sup> | Weighing<br>(mins) <sup>3</sup> | Materials<br>costs (\$) <sup>1</sup>                    | Space<br>(m <sup>2</sup> days) <sup>2</sup> | Set-up time<br>(mins) <sup>4</sup> | Plant<br>evaluation<br>(mins) <sup>3</sup> | Grain<br>sorting and<br>weighing<br>(mins) <sup>3</sup> |
| SSST <sub>7.8n</sub>           | 60.00                                    | 253.75                                         | 24.5                                  | 22.50±0.43                                 | -                                        | -                                   | -                               | 60.00                                                   | 253.75                                      | 22.00                              | 126.00±4.47                                | -                                                       |
| MSST <sub>7.2n</sub>           | 60.00                                    | 380.63                                         | 24.5                                  | 19.67±0.52                                 | -                                        | -                                   | -                               | 60.00                                                   | 380.63                                      | 22.00                              | 121.67±3.56                                | -                                                       |
| MSST <sub>20.4n</sub>          | 60.00                                    | 444.06                                         | 24.5                                  | 20.26±0.23                                 | -                                        | -                                   | -                               | 60.00                                                   | 444.06                                      | 22.00                              | 83.33±2.51                                 | -                                                       |
| Survival <sub>7.8n</sub>       | 12.00                                    | 37.80                                          | 15.39±4.11                            | 5.22±0.25                                  | 12.00±1.41                               | 49.50±3.88                          | 21.00±4.38                      | 12.00                                                   | 37.80                                       | 13.33                              | 46.33±4.89                                 | -                                                       |
| Survival <sub>20.4n</sub>      | 14.40                                    | 147.00                                         | 15.39±4.11                            | 5.22±0.25                                  | 19.83±1.33                               | 45.67±2.51                          | 23.17±1.54                      | 14.40                                                   | 147.00                                      | 13.33                              | 60.00±4.22                                 | -                                                       |
| Survival <sub>20.5f</sub>      | 14.40                                    | 147.00                                         | 15.39±4.11                            | 5.22±0.25                                  | 102.67±1.86                              |                                     |                                 | 14.40                                                   | 147.00                                      | 13.33                              | 62.67±6.64                                 | -                                                       |
| Build-up <sub>7.2f</sub>       | 12.00                                    | 51.45                                          | 15.39±4.11                            | 12.00±1.41                                 |                                          | 483.00±48.18 <sup>6</sup>           | 48.17±7.18                      | 12.00                                                   | 51.45                                       | 13.33                              | 59.33±5.79                                 | -                                                       |
| Build-up <sub>20.4n</sub>      | 14.40                                    | 147.00                                         | 15.39±4.11                            | 12.00±1.41                                 |                                          | 520.83±26.20 <sup>6</sup>           | 48.00±8.63                      | 14.40                                                   | 147.00                                      | 13.33                              | 56.67±3.99                                 | -                                                       |
| Oviposition <sub>20.2f/m</sub> | 14.40                                    | 108.00                                         | 15.39±4.11                            | -                                          |                                          | 285.17±21.48 <sup>6</sup>           | -                               | -                                                       | -                                           | -                                  | -                                          | -                                                       |
| Honeydew <sub>20.2f</sub>      | 8.00                                     | 14.40                                          | 93.33±5.67                            | -                                          | 111.67±3.65                              | -                                   | -                               | -                                                       | -                                           | -                                  | -                                          | -                                                       |
| DTW <sub>30.25n</sub>          | 26.00                                    | 2592.00                                        | 33.39±8.11                            | 11.80±1.41                                 |                                          | 3268.68±323.30 <sup>6</sup>         | 48.00±8.63                      | 26.00                                                   | 2592.00                                     | 26.67                              | 60.45±2.58                                 | 34.50±0.72                                              |

1: Materials costs were estimated for 1 replicate of 16 varieties based on costs in the Philippines  
2: Space requirements are estimated based on base area of arenas for 16 varieties over the duration of the test  
3: Based on 6-10 replicates  
4: Based on a single replicate with 16 varieties  
5: Times for scoring were evaluated once for Survival tests and once for DTW and Build-up tests (N = 6-10)  
6: Times for counting, sorting and assessment of development stages were not separated
